# Supplementary material for: A preliminary case study of the effect of shoe-wearing on the biomechanics of a horse’s foot
Source: PeerJ. 2016 Jul 14;4:e2164. doi: 10.7717/peerj.2164 (PMC4950542; doi:10.7717/peerj.2164)
Supplement: Data S1 — Column A shows the conditions. Column B lists the name and date of the steps. Column C lists the horse’s hip height in meters. Column D lists the frame rate of the Sony camera used for the speed calculations. Columns E and F list the start and end frame of each trial and each condition. Column G shows the difference between the start and end frame (i.e., number of frames elapsed). Column H shows the time in seconds and was calculated by dividing 1 over the camera frame rate (column D), multiplied by the frame difference (column G). Column I shows the distance that a marker placed on the middle of the body of the horse travelled between the start and end frames of the steps (columns E and F). Column J lists the velocity calculations per trial and condition. Velocity was measured by dividing the distance (column I) over the time (column H). Column K lists gravity at 9.81 ms−2 and column L lists the Froude number per trial and condition. Rows J6 and J 12 show the average velocity for the unshod and shod condition respectively. Rows L6 and L12 show the average Froude number for the unshod and shod conditions respectively. [file peerj-04-2164-s011.xlsx]

## Sheet: Sheet1
UNSHOD HORSE	TRIALS	HORSE HIP HEIGHT (m)	CAMERA FRAME RATE IN Hz	START FRAME	END FRAME	FRAME DIFFERENCE	Time (sec)	Distance (m)	VELOCITY (m/s)	g	FROUDE #
	04_08_11 TRIAL 34	0.92733	25	251	295	44	1.76	1.3	0.738636	9.81	0.0599733
	11_08_11 TRIAL 13	0.92733	25	230	272	42	1.68	1.3	0.77381	9.81	0.0658211
	11_08_11 TRIAL 51	0.92733	25	132	176	44	1.76	1.3	0.738636	9.81	0.0599733
	11_08_11 TRIAL 54	0.92733	25	217	258	41	1.64	1.3	0.792683	9.81	0.069071
									0.760941		0.0637097
SHOD HORSE	05_08_11 TRIAL 8	0.92733	25	169	208	39	1.56	1.3	0.833333	9.81	0.0763368
	05_08_11 TRIAL 9	0.92733	25	3220	3266	46	1.84	1.3	0.706522	9.81	0.0548716
	05_08_11 TRIAL 14	0.92733	25	447	498	51	2.04	1.3	0.637255	9.81	0.0446399
	05_08_11 TRIAL 43	0.92733	25	917	963	46	1.84	1.3	0.706522	9.81	0.0548716
									0.720908		0.05768
