# Supplementary material for: A preliminary case study of the effect of shoe-wearing on the biomechanics of a horse’s foot
Source: PeerJ. 2016 Jul 14;4:e2164. doi: 10.7717/peerj.2164 (PMC4950542; doi:10.7717/peerj.2164)
Supplement: Data S2 [file peerj-04-2164-s012.xlsx]

## Sheet: Data
Percent of Stance	GRF Craniocaudal								GRF Mediolateral								GRF Vertical
	Shod				Unshod				Shod				Unshod				Shod				Unshod
	Trial008	Trial009	Trial014	Trial043	Trial013	Trial034	Trial051	Trial054	Trial008	Trial009	Trial014	Trial043	Trial013	Trial034	Trial051	Trial054	Trial008	Trial009	Trial014	Trial043	Trial013	Trial034	Trial051	Trial054
0	-0.19204	-2.7383	1.2274	-6.8325	2.0641	-9.5849	-11.468	-3.6264	1.5011	-6.7624	3.0369	2.0902	-8.4599	-7.3113	0.56127	2.9341	0.29027	0.88568	2.2979	3.229	2.0881	4.2568	4.017	0.074053
1	-22.612	-28.991	-40.237	-54.8	-21.443	-56.534	-43.751	-27.046	0.1887	-29.999	-4.8807	-3.755	-10.498	-19.736	-14.218	18.814	80.076	83.129	90.675	96.899	55.849	119.38	82.064	41.963
2	-67.034	-80.855	-112.59	-139.33	-67.069	-112.93	-89.411	-73.895	7.1124	-43.775	-8.525	-1.2813	-9.1144	-25.74	-30.048	43.351	235.67	247.85	254.67	275.55	166.08	308.02	214.96	130.81
3	-120.31	-112.18	-139.49	-196.38	-120.71	-104.26	-121.88	-130.7	26.718	-11.156	6.3128	33.295	1.2667	-1.4162	-30.36	61.936	427.01	395.9	348.61	435.78	313.15	402.95	360.82	252.77
4	-139.7	-71.769	-95.118	-184.19	-151.78	-71.071	-128.75	-152.37	42.365	26.767	16.764	79.618	13.456	17.45	-15.988	56.699	577.54	464.18	360.4	518.03	450.23	436.05	478.02	356.27
5	-124.59	-31.07	-47.588	-150.12	-155.44	-48.076	-135.37	-137.77	41.7	32.717	14.317	81.047	10.886	16.752	-13.66	34.185	682.77	528.55	354.79	565.36	563.66	501.22	589.93	433.63
6	-111.3	-71.58	-46.622	-116.75	-141.63	-77.438	-130.93	-122.56	42.347	35.414	16.463	48.007	2.6457	19.314	-18.69	20.061	793.45	668.49	444.91	564.73	657.21	665.77	667.17	507.93
7	-135.41	-140.35	-91.085	-66.758	-146.66	-121.57	-136.21	-141.64	52.247	36.397	25.499	28.524	0.693	19.783	-19.11	18.322	961.14	790.67	606.81	579.79	772.14	829.07	763.84	623.17
8	-190.11	-160.74	-122.26	-48.466	-190.67	-144.56	-174.93	-194.34	62.63	34.411	32.972	31.158	5.0149	15.235	-13.473	19.568	1149.8	861.45	741.45	667.94	926.42	929.54	918.19	774.6
9	-235.26	-161.62	-143.72	-88.307	-251.37	-162.46	-231.6	-247.43	67.071	36.459	32.799	44.628	9.136	8.3552	-12.322	17.251	1301.5	929.86	852.42	831.21	1084.9	1007.6	1090.6	916.68
10	-258.84	-171.23	-169.41	-142.78	-297.85	-179.85	-272.95	-283.36	67.968	39.474	31.221	47.542	8.1378	1.8255	-21.637	9.3757	1417.3	1012.4	956.86	998.39	1221.2	1079	1227.2	1036.5
11	-272.3	-185.96	-187.68	-178.27	-326.29	-192.74	-289.71	-313.1	67.3	39.37	28.436	39.591	2.5741	-2.2004	-37.434	0.051975	1518.1	1091.9	1050.4	1137.4	1337.9	1150.7	1330.7	1149.2
12	-283.49	-193.56	-200.97	-192.82	-347.21	-204.91	-298.27	-344.63	63.757	37.225	22.684	30.6	-7.3283	-3.1655	-52.399	-6.8515	1614.4	1163.7	1140.6	1253	1449.2	1232.1	1436.5	1257.8
13	-291.68	-196.82	-211.58	-201.89	-363.12	-215.29	-310.81	-371.24	56.446	33.281	16.942	25.509	-20.093	-2.6251	-65.173	-12.408	1706.1	1227.8	1231.6	1371	1555.4	1322.4	1554.6	1355.5
14	-294.78	-200.55	-218.2	-217.82	-371.19	-220.98	-324.39	-386.86	46.85	26.042	11.425	24.788	-33.701	-2.3551	-77.234	-17.55	1796.4	1284.3	1319.6	1491.7	1652	1413.7	1669.3	1443.2
15	-294.66	-203.49	-224.13	-233.67	-373.46	-224.5	-335.86	-395.21	37.163	16.252	8.6302	23.992	-46.129	-3.9374	-88.277	-21.963	1884.4	1341.3	1404.2	1601.8	1739.2	1498.8	1762.8	1525.8
16	-293.24	-206.2	-231.82	-241.6	-375.43	-228.15	-342.78	-400.29	28.537	8.2901	8.2866	20.164	-55.974	-6.4601	-98.94	-25.759	1964.6	1405	1489.5	1688.4	1817	1579.1	1829.8	1605.4
17	-291.69	-210.48	-241.66	-243.17	-377.69	-231.35	-344.41	-401.33	22.536	4.1705	7.8468	14.7	-62.93	-7.9516	-107.01	-28.47	2033.9	1480.1	1577.8	1757.3	1881.2	1657.9	1878.7	1681
18	-289.67	-217.16	-254.04	-242.73	-377.49	-232.75	-343.35	-399.4	20.414	4.1991	8.6946	11.146	-66.687	-7.1346	-110.48	-30.939	2093.4	1571.6	1671.6	1821.2	1928.7	1737.6	1920.3	1752.3
19	-285.41	-224.83	-268.34	-243.27	-373.88	-234.45	-341.91	-397.74	21.635	7.5447	10.171	11.628	-67.954	-4.8855	-110.49	-35.143	2145.1	1675.1	1768.8	1888.4	1962.1	1819.5	1961.4	1817
20	-279.61	-233.8	-281.88	-246.29	-369.17	-238.88	-341.75	-396.52	24.899	10.766	11.559	14.6	-67.289	-2.9377	-109.05	-40.179	2190.2	1780.2	1865	1956.3	1986.6	1902.5	1997.1	1871.7
21	-274.73	-243.33	-294.66	-252.19	-365.18	-244.96	-342.81	-393.14	27.885	11.589	13.731	18.535	-65.38	-0.62872	-107.95	-44.566	2231.4	1881.2	1959.6	2020.3	2007.5	1982.9	2023.6	1916.2
22	-272.21	-248.88	-305.47	-258.94	-361.35	-250.06	-342.94	-387.4	29.559	10.264	17.399	21.782	-63.769	0.2994	-108.31	-46.81	2272.1	1976.2	2051	2080	2027.1	2061.1	2046	1953.1
23	-271.77	-250.63	-311.29	-264.28	-357.59	-254.09	-343.02	-380.34	30.683	8.8176	19.679	25.51	-64.007	-0.37412	-110.57	-47.697	2314.6	2066.4	2137.2	2134.9	2046.3	2139	2073.3	1987
24	-272.43	-250.24	-312.86	-266.99	-355.29	-258.15	-342.79	-374.41	31.779	8.8745	18.183	29.1	-66.14	-0.50762	-113.5	-49.342	2358.8	2152.3	2218	2184.1	2065.7	2216.1	2105.4	2023
25	-272.87	-246.2	-309.78	-265.4	-355.57	-260.6	-341.11	-370.39	32.464	10.417	14.525	30.602	-69.275	0.4218	-115.87	-54.016	2404.7	2232	2294.6	2229.6	2086.6	2291.2	2136	2065
26	-272.76	-240.02	-301.29	-259.4	-357.58	-259.31	-337.59	-366.65	32.749	11.784	10.86	30.371	-73.066	0.23616	-119.21	-59.42	2452.4	2305.9	2367.9	2273.6	2110	2363.1	2164.5	2110.1
27	-271.62	-232.13	-289.66	-251.58	-359.71	-253.49	-331.86	-363.01	32.553	12.601	8.7251	28.412	-76.439	-1.6174	-123.49	-62.211	2500.9	2374.4	2439.3	2318.2	2135.1	2430.3	2191.8	2152.8
28	-269.75	-221.3	-276.83	-244.53	-359.95	-244.08	-324.99	-361.31	31.552	13.402	9.1549	24.507	-78.221	-6.3255	-128.14	-62.587	2550.4	2436.5	2509.4	2366.7	2157.8	2494.7	2221.9	2192.2
29	-268.05	-208.87	-263.36	-238.13	-355.97	-231.78	-317.21	-360.13	29.358	12.77	9.2206	20.719	-78.934	-11.911	-133	-62.783	2602.5	2492.2	2578.2	2421	2179.6	2558.3	2255.5	2229.4
30	-264.78	-197.01	-250.25	-232.49	-347.2	-218.49	-307.18	-357.48	26.148	10.321	7.6419	17.228	-80.951	-15.453	-138.36	-64.477	2657.4	2543.7	2645.7	2482	2206.7	2622.3	2293.6	2265.8
31	-255.78	-186.41	-240.19	-226.71	-335.76	-205.45	-293.61	-351.91	23.69	8.3765	6.0308	13.17	-84.712	-17.013	-142.93	-67.952	2712.2	2592.9	2713.1	2550.3	2240.4	2688.6	2334.3	2300.9
32	-241.19	-175.93	-231.4	-216.93	-322.65	-192.92	-278.38	-342.59	22.512	8.0712	7.2569	9.8363	-89.005	-17.954	-145.31	-71.909	2764.7	2642.6	2779.4	2624.1	2277.8	2757.3	2376.4	2333.5
33	-224.89	-167.29	-219.65	-202.96	-308.18	-181.68	-262.99	-330.59	20.989	7.7351	9.9048	7.8258	-92.813	-18.298	-146.52	-74.967	2814.1	2695.5	2842.5	2698.8	2315	2823.3	2419	2363.3
34	-209.58	-159.11	-205.32	-188.04	-292.68	-172.45	-248.83	-317	18	6.9846	11.509	7.1379	-96.131	-18.648	-148.14	-76.759	2860.8	2750.7	2898.9	2771.3	2349.7	2881.9	2461.1	2389.4
35	-195.08	-150.64	-192.06	-173.29	-277.17	-167.26	-238.18	-304.35	14.226	5.4796	13.44	7.7668	-99.485	-20.002	-151.41	-79.005	2905.2	2805.6	2948.6	2840.5	2382.9	2932	2502.3	2412.5
36	-177.78	-144.65	-180.21	-158.23	-263.99	-165.73	-233.33	-297.92	9.5733	3.325	16.004	8.5531	-102.95	-21.822	-156.21	-83.722	2939.7	2859.6	2994.4	2905.4	2416.4	2973.8	2543.3	2433.3
37	-148.91	-135.48	-164.46	-143.06	-254.49	-149.22	-233.53	-298.2	6.7159	0.37015	16.654	8.6786	-106.66	-22.873	-160.84	-91.157	2965.1	2905.2	3030.5	2963.8	2451.6	2997.4	2583.7	2455.9
38	-113.74	-112	-140.78	-129.35	-245.91	-115.73	-226.02	-291.77	9.2812	-0.42349	14.327	8.5506	-109.49	-24.244	-162.46	-97.009	2986.9	2941.2	3059.6	3014.9	2486.4	3005.6	2613.6	2475.3
39	-89.815	-83.942	-126.82	-114.82	-227.72	-97.614	-199.48	-264.27	9.0776	0.40799	11.972	8.9534	-109.41	-24.31	-161.56	-97.562	3005	2966	3085.2	3055.4	2515.1	3009.7	2637.5	2491.3
40	-81.375	-66.749	-118.53	-92.973	-197.72	-99.846	-166.92	-230.09	10.719	1.1629	10.507	9.4977	-107.43	-24.787	-158.42	-94.213	3022.9	2985.7	3104.1	3081.3	2544	3014.2	2662.5	2508.1
41	-73.47	-57.08	-100.3	-63.924	-168.59	-96.328	-144.49	-209.96	12.827	2.1091	12.748	11.022	-105.84	-24.296	-153.74	-89.694	3033.4	3001.9	3113.9	3099.1	2572.7	3012	2681	2526.8
42	-54.426	-43.222	-82.58	-41.596	-149.93	-81.552	-133.82	-203.9	17.211	3.1328	18.091	13.69	-104.67	-20.657	-146.45	-84.834	3040.6	3012.3	3121.2	3110.7	2601.3	3007.5	2691.7	2546.5
43	-32.115	-24.928	-70.848	-30.323	-137.65	-70.311	-125.65	-197.21	23.632	7.6192	21.154	16.448	-102.92	-16.476	-139.57	-78.665	3046.1	3023.5	3130	3117.9	2626.1	3005.7	2697.6	2561.9
44	-14.937	-10.756	-54.241	-17.463	-120.44	-62.826	-112.61	-184.47	29.977	10.801	23.732	18.35	-97.834	-11.576	-134.62	-70.829	3054.4	3037	3140.5	3115.9	2644.4	3009.4	2705.1	2581.6
45	-1.2728	3.5219	-34.691	3.7102	-99.532	-47.714	-99.49	-171.93	35.248	15.852	27.271	22.511	-90.464	-4.1647	-130.77	-62.987	3066.8	3055.7	3154.6	3115.6	2662.1	3018.3	2717.7	2609
46	14.749	21.466	-17.005	21.163	-82.137	-28.02	-89.243	-161.89	40.336	22.187	31.725	26.945	-83.819	2.32	-127.03	-55.423	3080.4	3079.8	3172.3	3114.3	2685.4	3034.4	2729.8	2643.8
47	33.762	39.54	4.1122	35.5	-68.976	-12.567	-77.97	-149.32	46.842	29.687	36.609	32.489	-78.012	6.1568	-121.48	-45.758	3095.8	3109.9	3190.9	3120.8	2715.5	3058.9	2740.9	2678.2
48	51.497	56.881	28.277	53.553	-54.46	3.8979	-63.087	-132.09	53.371	38.195	40.448	38.563	-72.623	12.426	-115.9	-34.396	3111.8	3145.1	3208.4	3133.4	2745.5	3087.7	2756.1	2713.1
49	67.789	78.312	51.954	76.684	-35.993	25.043	-46.085	-114.35	59.239	45.04	44.426	46.014	-67.596	20.088	-111.23	-23.004	3129.4	3181.7	3224.3	3154.5	2774.8	3119.1	2778.7	2750.6
50	86.292	104.17	78.337	99.834	-17.105	46.463	-28.57	-97.901	64.633	49.22	49.026	52.519	-62.557	26.168	-106.53	-14.048	3147.2	3217.1	3236.7	3181.9	2805.7	3151.7	2804.3	2790.4
51	107.85	130.1	105.63	122.54	1.3267	67.394	-9.1022	-79.075	69.931	52.229	52.442	57.49	-57.255	30.725	-101.32	-7.5421	3164.1	3248.6	3244.5	3214.1	2838.6	3180.1	2829.6	2829.7
52	131.3	155.67	129.9	147.52	21.137	91.913	12.453	-55.773	75.239	55.224	54.334	62.809	-51.888	35.717	-96.134	-1.6244	3179.1	3272.4	3245.3	3247.9	2872.6	3199.6	2857.4	2868.3
53	155.82	181.63	152.64	174.07	43.242	117.87	33.548	-30.237	79.896	59.173	56.695	68.282	-45.939	41.645	-91.065	2.9693	3192.1	3285.8	3237.4	3280	2905.4	3206.4	2886.6	2905.1
54	180.69	207.15	175.51	200.65	66.544	142.11	54.12	-5.3738	83.029	62.004	60.406	73.971	-39.756	46.608	-86.687	6.7424	3202.1	3287.9	3220	3308.6	2936.1	3198.4	2911.6	2939.1
55	205.38	232.4	199.73	227.51	90.096	164.49	76.16	18.956	84.839	63.749	63.89	78.65	-33.053	50.298	-82.397	11.335	3208	3276.9	3192.4	3329.9	2962.1	3176.9	2931	2966.8
56	229.95	258.03	223.66	254.61	114.27	185.16	99.281	44.508	85.789	65.989	67.419	81.554	-26.272	53.52	-78.355	16.251	3208.5	3251.3	3155.6	3341.4	2982	3142.7	2944.9	2987.6
57	253.21	281.8	243.54	280.34	139.97	202.04	122.85	71.168	86.956	68.634	70.613	83.385	-20.023	54.35	-74.348	20.329	3203.3	3212	3111.2	3340.9	2992.2	3096.3	2953.8	2999.7
58	274.68	300.78	259.37	304.26	166.87	215.6	145.91	97.78	88.319	71.195	72.086	85.258	-15	54.665	-70.333	22.402	3191.9	3160.8	3061.5	3327.9	2991.1	3040.3	2954.1	3003.2
59	296.01	316.3	273.73	326.28	194.14	227.51	168.73	122.75	88.916	72.701	72.901	87.316	-10.988	55.749	-66.688	23.465	3173.4	3098.9	3006.3	3302.8	2979.1	2978	2944.7	2996.4
60	316.96	330.46	288.13	346.79	220.11	239.53	190.48	145.82	89.431	71.792	74.984	89.054	-7.406	56.667	-63.105	24.696	3147.3	3028.9	2948.4	3266	2958.3	2911.8	2926.6	2979.5
61	336.67	342.8	302.05	365.84	243.73	251	209.84	167.35	90.103	69.465	77.982	89.709	-3.6259	57.336	-59.573	26.506	3113.7	2953.8	2891.4	3218.2	2929.8	2844.7	2901.6	2952.1
62	353.9	354.04	314.17	383.26	264.81	259.87	227.43	186.65	90.633	67.055	81.038	89.202	0.63356	57.141	-55.829	28.658	3073.4	2876.1	2838.9	3160.6	2892.9	2779.7	2867.2	2914.5
63	368.97	365.68	325.6	398.5	283.22	268.55	244.18	203.96	90.966	65.097	83.676	88.092	5.348	57.045	-51.595	31.504	3027.3	2797	2792.5	3094.9	2847.8	2719.6	2821.8	2865.3
64	383.39	378.78	339.1	411.45	299.28	278.79	260.27	220.21	90.656	61.659	84.724	86.857	9.7775	58.659	-47.754	35.025	2975.9	2720.2	2752.9	3023.3	2796.2	2667.6	2769.6	2804
65	397.27	392.48	354.44	421.64	313.4	289.96	275.18	235.31	89.378	57.701	85.591	84.63	12.779	60.155	-45.807	37.888	2920.1	2651.5	2720.4	2947.2	2739	2624.7	2719.7	2734.7
66	410.28	407.14	370.73	429.03	325.02	303.6	288.4	247.42	87.416	54.359	86.696	81.399	14.596	60.043	-44.617	39.203	2861.6	2595.2	2695.3	2868.3	2676.8	2590.7	2671.1	2665.9
67	422.26	425.07	387.44	434.81	334.73	318.31	301.43	256.5	85.287	51.673	87.499	78.572	15.994	58.609	-41.992	39.312	2802.6	2553	2676.5	2789.5	2611.5	2565.6	2616.9	2600.1
68	431.41	446.12	405.83	439.89	344.18	331.58	314.82	264.82	83.901	49.454	88.558	76.614	16.723	56.974	-40.036	39.491	2744.7	2523	2663.9	2713.1	2544.8	2547.1	2561.6	2536.8
69	435.59	467.94	424.8	445.64	353.83	342.42	327.81	274.68	83.433	47.189	88.533	75.691	16.698	54.624	-39.628	40.024	2689.2	2503	2656.4	2640.9	2478.3	2532.9	2510.8	2476.4
70	433.2	488.03	440.49	451.86	362.94	354.47	340.32	286.19	83.467	44.943	87.393	75.393	16.167	52.974	-39.005	40.609	2638.7	2489.8	2654.3	2573.8	2413	2522.6	2465	2420.3
71	426.25	504.22	456.84	457.51	370.73	372.61	352.98	298.22	83.833	43.637	85.699	74.965	14.599	52.029	-38.038	40.757	2596.7	2480.5	2652.9	2512.4	2349.5	2513	2423.8	2369.8
72	424.99	515.79	478.65	460.38	377.9	393.3	365.94	309.58	83.232	44.734	83.181	73.107	12.171	49.901	-37.406	40.995	2558.1	2475.3	2638.1	2457.4	2287.9	2491.2	2387.4	2324.8
73	438.21	527.63	497.53	461.49	384.03	406.46	378.1	319.26	81.483	47.727	81.421	69.407	9.9893	45.193	-37	41.593	2512	2470.3	2599.6	2409.2	2229.4	2454	2356.3	2285
74	458.58	543.38	499.17	467.12	388.38	413.35	389.06	328.09	79.212	49.58	81.664	65.745	9.0706	44.67	-37.006	42.289	2465	2452.8	2532.5	2363.9	2175.2	2386.8	2332.4	2250.6
75	472.25	554.85	486.32	476.47	392.71	406.17	399.86	336.6	79.732	50.472	82.351	61.286	8.8064	46.316	-36.337	42.533	2417.9	2414.5	2437.7	2310.5	2124.4	2298.1	2311.8	2221.4
76	472.05	552.28	471.26	482.96	399.08	388.72	413.67	347.38	79.826	54.555	81.581	56.335	8.679	49.867	-34.15	42.069	2363.4	2350.2	2321.2	2243.5	2075.5	2195.4	2281.3	2196.5
77	462.76	534.83	452.7	478.89	407.43	372.83	426.81	363.39	79.92	59.734	79.392	53.263	8.4777	51.681	-33.032	42.355	2300.8	2260.1	2195	2160.7	2024.1	2074	2239.5	2172.1
78	455.37	510.4	428.24	461.17	412.68	355.68	434.4	379.7	81.652	64.082	77.027	52.572	7.2044	50.301	-31.431	43.309	2232.6	2151.8	2065	2063.4	1964.3	1948.2	2185.4	2143.9
79	452.33	484.11	401.38	436.34	412.15	332.38	434.59	389.86	84.558	67.948	72.288	53.897	6.3715	48.006	-27.76	44.318	2157	2033.6	1932	1953.7	1893.2	1815.2	2114.6	2108.3
80	446.67	454.14	373.63	409.15	403.26	304.49	426.78	395.13	86.838	69.988	65.665	56.076	7.5837	44.44	-23.113	46.295	2074.5	1912.9	1797.8	1833.1	1806.8	1676.4	2028.4	2057.2
81	432.95	420.28	346.6	380.49	383.74	275.45	413.41	396.17	87.15	70.616	59.294	57.373	10.108	39.673	-17.302	48	1987.6	1791.9	1666.8	1714.8	1708.1	1534.2	1926.5	1987.2
82	415.06	386.95	321.3	352.74	357.68	241.51	394.7	386.32	86.87	69.253	54.577	58.419	13.467	36.382	-11.542	48.455	1895.5	1671.8	1543.3	1602.9	1593.2	1392.7	1812	1904.6
83	395.91	356.85	297.04	330.35	325.09	205.82	369.56	366.54	86.482	67.489	51.151	58.849	16.075	33.503	-6.7318	48.133	1797	1554.2	1426.5	1498.1	1466.2	1260.6	1688.2	1804.5
84	376.5	328.28	273.33	314.02	286.7	178.2	337.76	342.39	86.628	66.346	47.024	57.143	16.947	31.706	-3.3773	47.432	1694.8	1438.9	1317.6	1400.8	1339	1141	1556.5	1682.9
85	355.39	302.65	252.95	298.05	249.14	158.16	300.93	312.7	88.618	63.44	40.375	53.053	18.084	29.611	-1.4353	45.838	1590.7	1328.5	1215.4	1305.3	1217.2	1039.6	1420.3	1550.2
86	331.25	280.4	233.45	274.37	218.91	142.85	263.14	275.88	90.759	59.059	33.661	48.411	19.294	27.761	0.27769	42.521	1486.3	1222.9	1116.4	1201.6	1104.8	951.94	1286.5	1412.9
87	305.71	257.38	212.31	242.39	196.65	131.34	228.71	235.92	90.149	53.769	29.352	44.578	20.146	26.308	1.6425	36.668	1381.9	1116.6	1014.8	1089.6	1006.2	873.31	1162.5	1277.5
88	278.21	228.05	184.91	207.65	179.13	119.91	201.75	200.37	86.777	48.437	26.161	41.59	20.845	24.918	4.0498	32.419	1273.3	1002.5	905.77	978.41	919.22	800.3	1054.3	1154.6
89	245.48	190.75	153.08	175.75	162.79	107.57	182.5	173.85	83.36	45.183	24.181	37.858	20.528	23.223	6.6933	31.928	1157	882.57	800.61	875.19	838.01	727.51	959.78	1047.3
90	205.18	152.02	127.25	149.77	146.9	94.74	167.02	153.47	81.114	43.061	22.236	33.181	19.941	19.892	8.3692	33.22	1031.5	773.45	709.64	780.85	758.03	652.15	873.32	950.87
91	164.25	122.5	108.71	129.45	130.65	80.692	150.95	136.03	79.36	41.345	19.059	29.811	19.441	15.966	8.8448	34.809	909.18	683.7	627.81	696.02	678.31	578.61	790.75	861.65
92	134.31	104.43	94.13	113.16	113.64	66.989	134.44	121.15	76.448	40.107	15.306	28.808	19.468	13.906	8.8112	34.977	808.2	602.39	553.63	616.56	598.4	511.22	709.23	776.83
93	118.84	92.394	83.197	100.55	96.398	56.234	119.64	108.27	74.367	38.452	11.188	27.396	20.784	14.699	10.564	33.023	722.17	523.04	482.96	537.75	518.77	447.16	627.49	691.95
94	110.55	81.516	75.035	90.752	80.458	47.973	106.75	97.319	75.45	35.371	6.5139	23.395	22.042	15.572	14.061	29.736	634.06	441.28	411.73	456.26	439.01	380.96	545.37	605.23
95	100.77	70.192	66.263	79.113	66.68	39.221	95.174	89.239	75.564	30.163	2.9261	18.113	22.352	15.069	17.901	26.165	531.69	353.48	336.42	367.9	358.95	308.71	461.27	513.19
96	85.304	55.412	54.783	61.857	54.005	26.703	84.19	81.672	70.406	23.819	1.2701	13.281	22.329	14.225	20.905	22.863	407.95	256.48	252.94	270.89	278.71	222.91	371.21	411.67
97	62.515	34.518	37.996	40.482	41.289	10.775	71.224	69.884	58.016	17.69	0.072727	9.5678	22.164	12.405	22.828	19.94	268.82	155.58	162.98	170.57	198.67	129.5	271.46	299.34
98	35.45	12.369	18.146	19.538	28.589	-3.4296	53.916	51.45	40.503	12.056	-1.0687	6.8032	21.244	7.5894	22.241	18.028	136.43	69.735	80.589	82.16	121.05	52.221	166.14	181.99
99	12.832	-0.57922	3.1307	4.697	16.657	-11.08	33.863	28.37	23.57	7.63	-0.28189	5.317	19.081	1.9763	18.37	16.722	42.833	18.245	24.762	24.141	53.03	10.562	70.085	76.752
100	1.3707	-3.3582	-4.2185	-1.952	6.6628	-12.45	17.052	7.7085	13.05	4.3723	2.0617	5.4682	16.106	-0.81347	13.297	14.859	1.5806	0.1206	1.5839	0.58624	3.5207	1.0771	2.2424	4.1585
